# Supplementary material for: Ethylcoprostanol modulates colorectal cancer cell proliferation and mitigates cytotoxicity of cholesterol metabolites in non-tumor colon cells
Source: Royal Society of Chemistry journal article supplement (doi:10.1039/d3fo01868g), 2023-01-01
Supplement: d3fo01868g1.pdf [file d3fo01868g1.pdf]

## Electronic Supplementary Information

**Table S1.** Sequence of primers of the evaluated genes and their efficiency in Caco-2 and CCD-18Co cells.

| Gene          | Primer sequence (5'→3')  |                           | Efficiency (%) |          |
|---------------|--------------------------|---------------------------|----------------|----------|
|               | Forward                  | Reverse                   | Caco-2         | CCD-18Co |
| <i>BAX</i>    | GGGCCACCAGCTCTGA         | CCTGCTCGATCCTGGATGA       | 108            | 122      |
| <i>BCL2</i>   | GGATTGTGGCCTTCTTTGAG     | GCCGGTTCAGGTA CT CAGTC    | 121            | 136      |
| <i>CASP3</i>  | CCTGGTTATTATTCTTG GCGAAA | GCACAAAGCGACTGGATGAA      | 125            | 121      |
| <i>CASP8</i>  | CAGGCAGGGCTCAAATTTCT     | TCTGCTCACTTCTTCTGAAATCTGA | 121            | 122      |
| <i>CASP9</i>  | TGCTGAGCAGCGAGCTGTT      | AGCCTGCCCGCTGGAT          | 130            | 134      |
| <i>CDKN1A</i> | GATGAGTTGGGAGGAGGCAG     | GAGCGAGGCACAAGGGTACA      | 140            | 111      |
| <i>TP53</i>   | CCACCATCCACTACA ACTACAT  | CACAAACACGCACCTCAA        | 135            | 116      |
| <i>CCND1</i>  | CCCTCGGTGTCCTACTTCAA     | AGGAAGCGGTCCAGGTAGTT      | 107            | 118      |
| <i>CCNE1</i>  | CTCCAGGAAGAGGAAGGCAA     | TCGATTTTGGCCATTTCTTCA     | 127            | 95       |
| <i>ACTB</i>   | CTGGAACGGTGAAGGTGACA     | AAGGGACTTCCTGTAACAATGCA   | 112            | 115      |
